# Supplementary material for: Program Evaluation of Environmental and Policy Approaches to Physical Activity Promotion in a Lower Income Latinx School District in Southeast Los Angeles
Source: PubMed Central journal article supplement (PMC7698008; doi:10.3390/ijerph17228405), 2020-11-13
Supplement: ijerph-17-08405-s001.pdf [file ijerph-17-08405-s001.pdf]

**Supplementary Table 1.** Program evaluation rubric for WellSAT2.0 district wellness policy and after school program practices and policies.

| <b>Instrument</b> | <b>Section</b>                           | <b>Number of Physical Activity Items</b> | <b>Number of Physical Activity Items Scored</b> | <b>All Items Same Scoring</b> | <b>Scoring</b>                                                                                            | <b>Calculation</b>                                                                                                                                                                                                                                                                                                       | <b>Interpretation</b>                                                                               |
|-------------------|------------------------------------------|------------------------------------------|-------------------------------------------------|-------------------------------|-----------------------------------------------------------------------------------------------------------|--------------------------------------------------------------------------------------------------------------------------------------------------------------------------------------------------------------------------------------------------------------------------------------------------------------------------|-----------------------------------------------------------------------------------------------------|
| WellSAT2.0        | Physical Education and Physical Activity | 20                                       | 19                                              | Yes                           | 0 (Not Mentioned)<br>1 (Weak Statement)<br>2 (Meets/Exceeds Expectations)                                 | Comprehensiveness: count the number of items rated as "1" or "2," divide this number by the number of policy items in the section, and multiply this number by 100<br>Strength: count the number of items rated as "2," divide this number by the number of policy items in the section, and multiply this number by 100 | Comprehensiveness, Strength scores range 0-100                                                      |
| HAAND             | Schedule of physical activity            | 3                                        | 3                                               | No                            | Time allocated (0, 1, 2, or 3 points)<br>Types of activities (0, 1, or 2 points)<br>Equity (0 or 1 point) | Average of school level score                                                                                                                                                                                                                                                                                            | Points possible:<br>Time allocated = 3 points<br>Types of activities = 2 points<br>Equity = 1 point |

Healthy Afterschool Activity and Nutrition Documentation (HAAND).
